# Supplementary material for: Electrical Relaxation and Transport Properties of ZnGeP2 and 4H-SiC Crystals Measured with Terahertz Spectroscopy
Source: MDPI journal article supplement (doi:10.3390/photonics10070827), 2023-07-16
Supplement: s1 [file s1]

# Supplementary materials to

## Electrical Relaxation and Transport Properties of ZnGeP<sub>2</sub> and 4H-SiC Crystals

### Measured with Terahertz Spectroscopy

Vladimir I. Voevodin <sup>1,2</sup>, Valentin N. Brudnyi <sup>3</sup>, Yury S. Sarkisov <sup>4</sup>, Xinyang Su <sup>5</sup> and Sergey Yu. Sarkisov <sup>1,6,\*</sup>

<sup>1</sup> Synchrotron Radiation Detector Laboratory, R&D Center “Advanced Electronic Technologies”, Tomsk State University, Tomsk 634050, Russia; vovodinvova2013@yandex.ru

<sup>2</sup> LLC Laboratory of Optical Crystals, Tomsk 634040, Russia

<sup>3</sup> Department of Semiconductor Physics, Tomsk State University, Tomsk 634050, Russia; brudnyi@mail.tsu.ru

<sup>4</sup> Department of Physics, Chemistry and Theoretical Mechanics, Tomsk State University of Architecture and Building, Tomsk 634003, Russia; sarkisov@tsuab.ru

<sup>5</sup> School of Physical Science and Engineering, Beijing Jiaotong University, Beijing 100044, China; xysu@bjtu.edu.cn

<sup>6</sup> Laboratory for Terahertz Research, Tomsk State University, Tomsk 634050, Russia

\* Correspondence: sarkisov@mail.tsu.ru

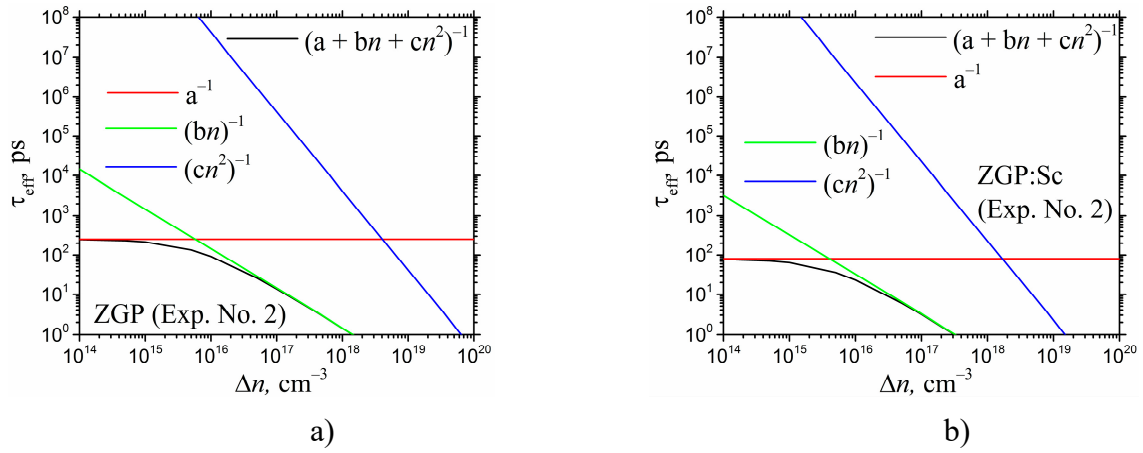

**Figure S1.** Calculated injection level dependences of efficient charge carrier lifetime with the resolution into contributions from different recombination mechanisms for (a) ZnGeP<sub>2</sub> (Exp. No. 2) and (b) ZnGeP<sub>2</sub>:Sc (Exp. No. 2).

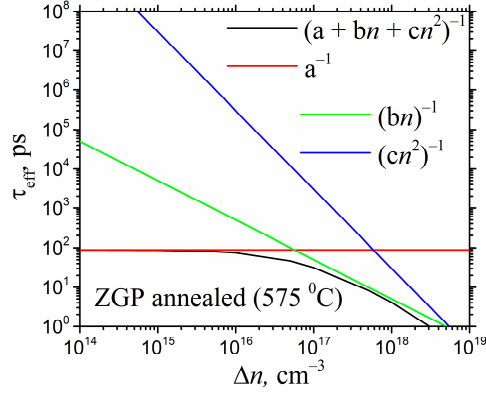

a)

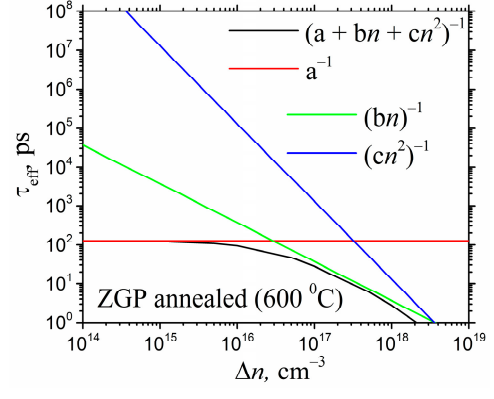

b)

**Figure S2.** Calculated injection level dependences of efficient charge carrier lifetime with the resolution into contributions from different recombination mechanisms for (a) ZnGeP<sub>2</sub> (Exp. No. 1) annealed at T=575 °C and (b) ZnGeP<sub>2</sub> (Exp. No. 1) annealed at T=600 °C.

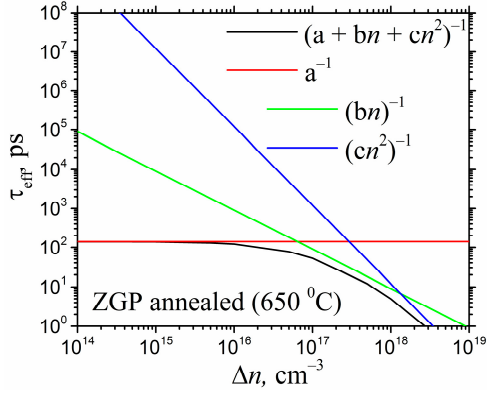

a)

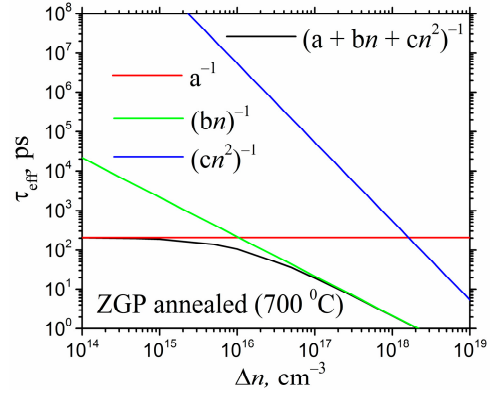

b)

**Figure S3.** Calculated injection level dependences of efficient charge carrier lifetime with the resolution into contributions from different recombination mechanisms for (a) ZnGeP<sub>2</sub> (Exp. No. 1) annealed at T=650 °C and (b) ZnGeP<sub>2</sub> (Exp. No. 1) annealed at T=700 °C.

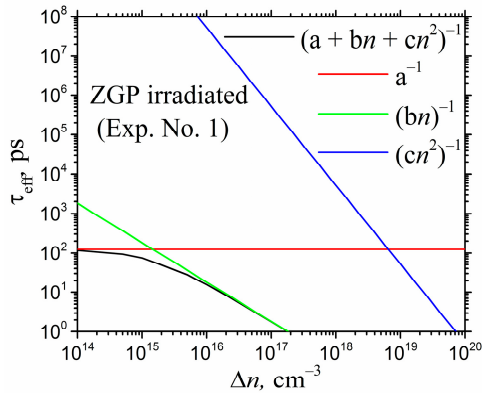

a)

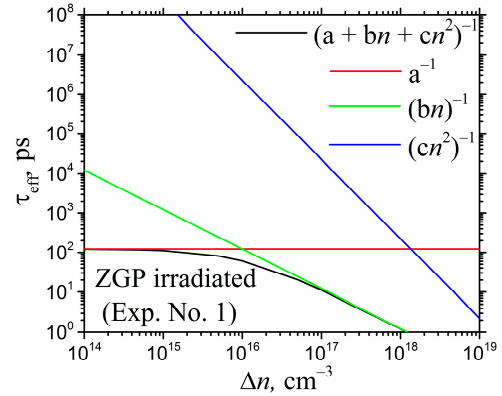

b)

**Figure S4.** Calculated injection level dependences of efficient charge carrier lifetime with the resolution into contributions from different recombination mechanisms determined for (a) thin and (b) thick slab of electron irradiated ZnGeP<sub>2</sub> (Exp. No. 1).

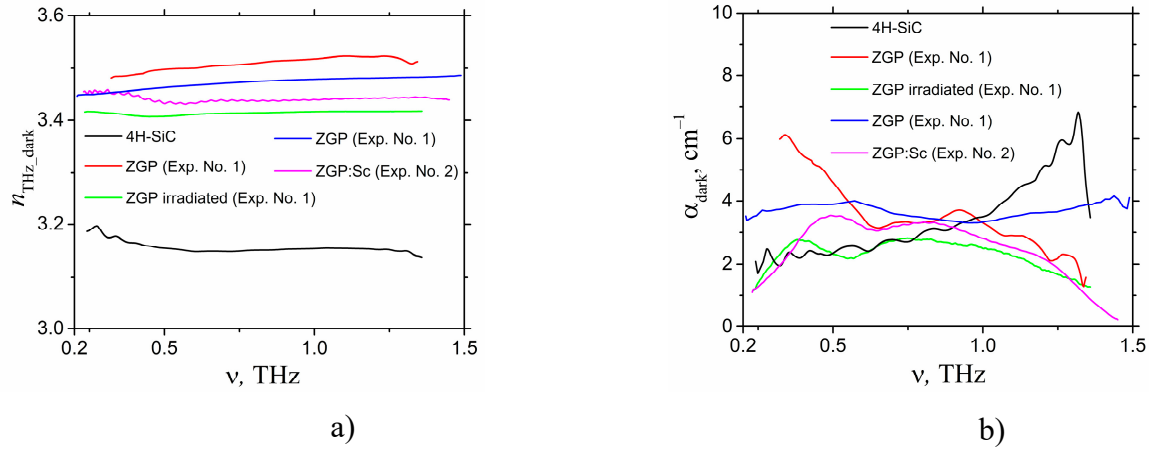

**Figure S5.** The terahertz spectra of (a) refractive index and (b) absorption coefficient of ZnGeP<sub>2</sub> (Exp. No. 1), electron irradiated ZnGeP<sub>2</sub> (Exp. No. 1), ZnGeP<sub>2</sub>:Sc (Exp. No. 2), ZnGeP<sub>2</sub>:Sc (Exp. No. 2) and 4H-SiC crystals.

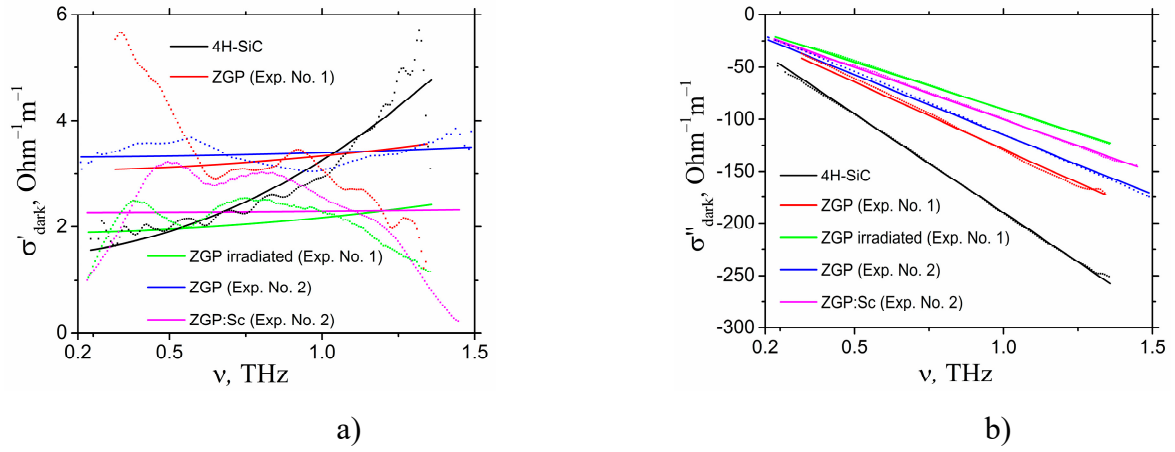

**Figure S6.** The terahertz spectra of (a) real and (b) imaginary parts of dark complex conductivity measured in ZnGeP<sub>2</sub> (Exp. No. 1), electron irradiated ZnGeP<sub>2</sub> (Exp. No. 1), ZnGeP<sub>2</sub>:Sc (Exp. No. 2), ZnGeP<sub>2</sub>:Sc (Exp. No. 2) and 4H-SiC crystals. Symbols – experimental data, solid lines – Drude-Smith fitting (the parameters are given in Table S1).

**Table S1.** The Drude-Smith model fitting parameters (for fitting of dark complex conductivity measured in ZnGeP<sub>2</sub> (Exp. No. 1), electron irradiated ZnGeP<sub>2</sub> (Exp. No. 1), ZnGeP<sub>2</sub> (Exp. No. 2), ZnGeP<sub>2</sub>:Sc (Exp. No. 2) and 4H-SiC crystals).

| Sample                      | $L, \mu\text{m}$ | $\Delta n, \text{cm}^{-3}$ | $\tau, \text{fs}$ | $c_b$ |
|-----------------------------|------------------|----------------------------|-------------------|-------|
| ZGP (Exp. No. 1)            | 202              | $2.6 \cdot 10^{21}$        | 0.17              | -1    |
| ZGP (Exp. No. 1) irradiated | 202              | $8.5 \cdot 10^{20}$        | 0.25              | -1    |
| ZGP (Exp. No. 2)            | 199              | $1.96 \cdot 10^{22}$       | 0.06              | -1    |
| ZGP:Sc (Exp. No. 2)         | 193              | $1.54 \cdot 10^{23}$       | 0.02              | -1    |
| 4H-SiC                      | 376              | $7.95 \cdot 10^{20}$       | 0.75              | -1    |
